# Supplementary material for: Application of neck/chest CT to establish the evaluation perforation model of esophageal foreign body
Source: Research Square preprint supplement (doi:10.21203/rs.3.rs-5392153/v1), 2024-12-09
Supplement: Supplementary file 1 [file 6e3bbdd93412f5b04cd4ae20.docx]

Table1 Clinical characteristics and risk factors of EFBs patients with jujube pits

| Characteristics | Total | Perforation | Non perforation | p |
| --- | --- | --- | --- | --- |
| Age（Y） | 61.60±12.97 | 66.44±11.90 | 59.57±12.92 | 0.002* |
| Male：Female | 13:41 | 13:35 | 13:44 | 0.561 |
| Size of jujube pits（cm） | 1.96±0.42 | 2.19±0.40 | 1.87±0.39 | 0.000* |
| Impaction time（h） | 9.00  (5.00,19.25) | 9.00  (5.00,22.50) | 9.00  (5.00,19.25) | 0.600 |
| Impaction angle（°） | 61.50  (38.75, 76.25) | 75.50  (69.00,85.00) | 54.00  (33.75,66.25) | 0.000* |

Table2 Multifactorial logistic regression analysis of perforation complications in patients with EFBs

| Risk factors | Β value | S.E | Wald value | OR value | 95% CI | | P |
| --- | --- | --- | --- | --- | --- | --- | --- |
| Age（Y） | -0.077 | 0.023 | 11.718 | 0.926 | 0.886 | 0.968 | 0.001* |
| Jujube pit size（cm） | -2.586 | 0.671 | 14.842 | 0.075 | 0.020 | 0.281 | 0.000* |
| Impaction angle（°） | -0.077 | 0.015 | 25.653 | 0.926 | 0.899 | 0.954 | 0.000* |
